# Supplementary material
Source: PubMed Central journal article supplement (PMC7960474)
Supplement: 4823_tables.pdf [file 4823_tables.pdf]

**On-line Table 1: Patient demographics**

| Pt | Age (yr) | Sex | Tumor Location                                             | Previous Cycles of IV BV | Steroids | Dose of SIACI BV <sup>a</sup> | Tx after SIACI BV                 | TTP <sup>b</sup> (Days) | OS <sup>b</sup> (Days) |
|----|----------|-----|------------------------------------------------------------|--------------------------|----------|-------------------------------|-----------------------------------|-------------------------|------------------------|
| 1  | 49       | M   | R frontal                                                  | 0                        | Y        | 14                            | Lomustine                         | 851                     | 1255                   |
| 2  | 60       | F   | R temporoparietal                                          | 0                        | Y        | 4                             | Irinotecan, IV BV                 | 750                     | 889                    |
| 3  | 67       | F   | R parieto-occipital                                        | 3.5                      | Y        | 6                             | TMZ, IA cetuximab                 | 1153                    | 1357                   |
| 4  | 75       | M   | R temporal                                                 | 0                        | Y        | 15                            | RT                                | 435                     | 504                    |
| 5  | 51       | F   | L temporal                                                 | 0                        | Y        | 15                            | Erlotinib, carboplatin, lomustine | 560                     | –                      |
| 6  | 43       | M   | Brain stem                                                 | 6                        | N        | 8                             | IA cetuximab                      | 273                     | 336                    |
| 7  | 29       | F   | Posterior body and splenium of corpus callosum, R thalamus | 0                        | Y        | 15                            | Irinotecan, IV BV                 | 730                     | 1111                   |
| 8  | 52       | F   | R temporal                                                 | 0                        | Y        | 13                            | TMZ                               | 340                     | 514                    |
| 9  | 61       | M   | L frontal                                                  | 0                        | Y        | 10                            | None                              | 185                     | 340                    |
| 10 | 66       | M   | L parietotemporal                                          | 9                        | Y        | 15                            | None                              | –                       | 918                    |
| 11 | 61       | F   | L occipital, L splenium                                    | 0                        | Y        | 15                            | Carboplatin                       | 683                     | 956                    |
| 12 | 58       | F   | R parietal                                                 | 0                        | Y        | 15                            | None                              | 133                     | 252                    |
| 13 | 56       | M   | L insula                                                   | 0                        | Y        | 15                            | None                              | 350                     | 449                    |
| 14 | 55       | M   | High parasagittal, R parietal                              | 0                        | Y        | 15                            | None                              | 618                     | 848                    |
| 15 | 70       | M   | L temporal                                                 | 0                        | Y        | 15                            | None                              | 1186                    | 1277                   |
| 16 | 81       | F   | L occipital                                                | 0                        | N        | 15                            | None                              | 581                     | –                      |
| 17 | 68       | M   | L temporal                                                 | 0                        | Y        | 15                            | None                              | 708                     | 776                    |
| 18 | 48       | M   | R frontal                                                  | 0                        | Y        | 15                            | None                              | 287                     | 460                    |
| 19 | 44       | F   | L temporal                                                 | 4                        | Y        | 8                             | Irinotecan, TMZ, IV BV            | 300                     | 429                    |
| 20 | 44       | F   | R basal ganglia, R frontal, and corpus callosum            | 0                        | Y        | 6                             | TMZ, IV BV                        | 402                     | 589                    |
| 21 | 30       | M   | L frontal, parietal, and basal ganglia                     | 6                        | Y        | 10                            | None                              | 733                     | 795                    |
| 22 | 59       | M   | R temporoparietal                                          | 0.5                      | Y        | 15                            | Operation, IA cetuximab           | 1062                    | 1152                   |
| 23 | 43       | M   | L temporal                                                 | 0                        | Y        | 15                            | TMZ, IV BV                        | 231                     | 430                    |
| 24 | 53       | M   | R basal ganglia, genu of corpus callosum                   | 4                        | Y        | 6                             | None                              | 328                     | 384                    |
| 25 | 31       | F   | R parietal, occipital, and splenium of corpus callosum     | 0                        | Y        | 15                            | Carboplatin                       | 1750                    | –                      |

**Note:**—IA indicates intra-arterial; L, left; Pt, patient; R, right; TMZ, temozolomide; Tx, treatment; –, not available; RT, radiotherapy.

<sup>a</sup> Dose in milligram/kilogram.

<sup>b</sup> TTP and OS were calculated using the date of the operation for primary GBM to the date of radiologic progression of disease after SIACI BV and date of death.

**On-line Table 2: Median percentage change in rCBV and rCBF following SIACI**

| Patient No.                              | rCBV <sup>a</sup> |                 |                                |                    | rCBF <sup>a</sup> |                 |                                |                    |
|------------------------------------------|-------------------|-----------------|--------------------------------|--------------------|-------------------|-----------------|--------------------------------|--------------------|
|                                          | Max Enhancing     | Max rCBV        | Nonenhancing T2 Hyperintensity | Contralateral NAWM | Max Enhancing     | Max rCBV        | Nonenhancing T2 Hyperintensity | Contralateral NAWM |
| 1                                        | -66.30            | -74.39          | -50.59                         | 20.55              | -56.93            | -63.82          | -37.19                         | -46.12             |
| 2                                        | -34.35            | -69.71          | 158.48                         | -20.00             | -43.04            | -67.05          | -20.67                         | 38.11              |
| 3                                        | 66.63             | -14.11          | 80.50                          | 22.73              | 31.44             | -25.47          | 46.15                          | -11.79             |
| 4                                        | -52.79            | -13.79          | 27.75                          | -32.56             | -45.03            | -15.25          | 20.99                          | 67.22              |
| 5                                        | 16.890            | -58.09          | 136.91                         | 14.75              | 12.55             | -56.74          | 145.63                         | -11.15             |
| 6                                        | -27.49            | -7.41           | 16.62                          | 2.94               | -30.04            | -16.82          | 42.84                          | -17.12             |
| 7                                        | -43.07            | -79.18          | -42.58                         | -57.14             | -31.80            | -76.40          | -28.00                         | 51.61              |
| 8                                        | -39.46            | -39.46          | 76.22                          | -4.94              | -47.56            | -47.56          | 113.73                         | 29.26              |
| 9                                        | -31.86            | -47.62          | -61.32                         | 143.75             | -31.56            | -45.45          | -44.37                         | -23.63             |
| 10                                       | -20.00            | -33.93          | 5.95                           | -22.22             | -12.29            | -30.67          | 11.16                          | 5.24               |
| 11                                       | -33.45            | 2.38            | 37.55                          | 10.38              | -28.05            | 13.66           | 35.38                          | -20.99             |
| 12                                       | 117.64            | -53.85          | 96.31                          | -2.00              | 55.60             | -66.57          | 63.62                          | 75.74              |
| 13                                       | 21.69             | 38.90           | 184.63                         | -82.35             | 15.65             | 40.36           | 158.46                         | -56.60             |
| 14                                       | -34.28            | -40.98          | -13.83                         | 196.55             | -37.52            | -45.97          | -14.74                         | 50.83              |
| 15                                       | -28.08            | 34.83           | 30.96                          | -4.26              | -30.70            | 44.18           | 15.46                          | 0.36               |
| 16                                       | -57.80            | -36.72          | -33.07                         | -6.76              | -54.27            | 3.25            | -21.19                         | -2.98              |
| 17                                       | 51.42             | -22.99          | 157.76                         | 4.29               | 34.75             | -23.78          | 149.41                         | -10.09             |
| 18                                       | -1.16             | -29.24          | 255.42                         | 50.63              | -21.11            | -40.68          | -65.88                         | 68.95              |
| 19                                       | 1.12              | -4.39           | 23.08                          | -13.33             | 21.18             | -9.21           | 23.35                          | -68.77             |
| 20                                       | 7.54              | 21.19           | 30.04                          | -17.20             | 6.00              | 25.52           | 21.70                          | 1.59               |
| 21                                       | -4.01             | -32.24          | -6.81                          | -13.33             | 0.99              | -26.78          | -3.42                          | -0.91              |
| 22                                       | -32.84            | -12.87          | -83.26                         | 0.000              | -27.25            | -9.19           | -73.03                         | 50.63              |
| 23                                       | 40.87             | -38.70          | 217.37                         | -6.59              | 47.83             | -45.15          | 208.97                         | 3.99               |
| 24                                       | -25.30            | -64.33          | -61.21                         | -26.25             | -19.91            | -61.04          | -63.85                         | -1.19              |
| 25                                       | -31.29            | -7.75           | 145.08                         | 28.57              | -66.00            | -49.42          | 61.25                          | 33.46              |
| Median % change (interquartile range)    | -34.38-7.55       | -47.62 to -7.75 | -13.83-136.91                  | -17.20-14.75       | -37.52-12.55      | -49.42 to -9.21 | -21.19-61.25                   | -11.79-38.11       |
| P value for median % change <sup>b</sup> | -66.30-117.64     | -79.18-38.90    | -83.26-255.42                  | -82.35-196.55      | -66.00-55.60      | -76.40-44.18    | -73.03-208.97                  | -68.77-75.74       |
|                                          | .074              | .001            | .069                           | .568               | .037              | .001            | .216                           | 0696               |

<sup>a</sup> Listed values are calculated as median percentage change = [(Posttreatment - Pretreatment)/Pretreatment × 100%].  
<sup>b</sup> Listed values are compared with 0% change (null value).

**On-line Table 3: Mean percentage change in rCBV and rCBF following SIACI**

| Pt | rCBV          |          |                                |                    | rCBF          |          |                                |                    |
|----|---------------|----------|--------------------------------|--------------------|---------------|----------|--------------------------------|--------------------|
|    | Max Enhancing | Max rCBV | Nonenhancing T2 Hyperintensity | Contralateral NAWM | Max Enhancing | Max rCBV | Nonenhancing T2 Hyperintensity | Contralateral NAWM |
| 1  | -68.42        | -72.42   | -51.43                         | 21.48              | -54.83        | -61.46   | -35.23                         | -45.21             |
| 2  | -32.39        | -71.77   | 160.57                         | -21.31             | -45.13        | -69.13   | -22.62                         | 37.05              |
| 3  | 67.54         | -13.19   | 82.49                          | 25.82              | 29.37         | -26.37   | 45.23                          | -15.69             |
| 4  | -53.85        | -12.63   | 25.62                          | -35.12             | -43.12        | -14.31   | 21.87                          | 63.31              |
| 5  | 18.93         | -56.17   | 135.82                         | 15.14              | 11.42         | -58.71   | 142.72                         | -10.19             |
| 6  | -29.53        | -6.29    | 15.54                          | 1.19               | -29.17        | -14.73   | 45.75                          | -18.08             |
| 7  | -45.13        | -79.18   | -40.52                         | -58.23             | -33.74        | -77.35   | -29.11                         | 53.53              |
| 8  | -37.53        | -41.62   | 78.37                          | -3.76              | -45.48        | -46.50   | 114.59                         | 27.19              |
| 9  | -33.79        | -49.32   | -59.43                         | 145.22             | -33.43        | -43.36   | -42.42                         | -21.71             |
| 10 | -18.11        | -32.83   | 7.74                           | -19.75             | -10.35        | -32.88   | 9.11                           | 3.17               |
| 11 | -31.33        | 3.42     | 35.49                          | 11.29              | -27.13        | 14.53    | 33.42                          | -22.88             |
| 12 | 115.73        | -55.83   | 97.37                          | -3.20              | 56.53         | -67.61   | 65.57                          | 73.83              |
| 13 | 23.58         | 40.85    | 183.42                         | -82.35             | 17.53         | 41.29    | 157.43                         | -55.71             |
| 14 | -36.42        | -40.98   | -15.68                         | 194.64             | -35.47        | -46.89   | -13.66                         | 49.91              |
| 15 | -25.13        | 35.42    | 31.93                          | -2.33              | -28.51        | 45.21    | 16.53                          | 1.43               |
| 16 | -60.73        | -37.63   | -35.13                         | -6.76              | -56.33        | 2.32     | -23.12                         | -3.89              |
| 17 | 50.51         | -23.35   | 158.62                         | 6.36               | 35.21         | -25.63   | 150.48                         | -9.21              |
| 18 | -0.39         | -30.41   | 256.32                         | 48.57              | -22.32        | -38.72   | -67.79                         | 67.99              |
| 19 | 3.41          | -3.43    | 25.13                          | -15.47             | 23.15         | -10.37   | 24.35                          | -67.63             |
| 20 | 5.71          | 22.24    | 31.28                          | -15.51             | 4.12          | 26.49    | 20.45                          | 0.81               |
| 21 | -5.17         | -35.27   | -8.15                          | -15.21             | 1.53          | -28.63   | -5.69                          | -1.54              |
| 22 | -31.72        | -14.83   | -85.63                         | 2.16               | -28.19        | -7.91    | -70.27                         | 51.49              |
| 23 | 39.75         | -40.63   | 219.24                         | -7.61              | 45.79         | -41.09   | 210.81                         | 5.81               |
| 24 | -24.59        | -66.38   | -62.91                         | -25.21             | -17.32        | -65.13   | -65.93                         | -3.71              |
| 25 | -30.89        | -8.09    | 144.92                         | 27.92              | -65.53        | -50.09   | 60.69                          | 34.09              |
